# Supplementary material for: The Soret absorption band of isolated chlorophyll a and b tagged with quaternary ammonium ions
Source: Royal Society of Chemistry journal article supplement (doi:10.1039/c5cp01513h), 2015-01-01
Supplement: c5cp01513h1.pdf [file c5cp01513h1.pdf]

**Electronic Supporting Information** DOI: 10.1039/b000000x/

**The Soret absorption band of isolated chlorophyll a and b tagged with quarternary ammonium ions**

Mark H. Stockett, Lihi Musbat, Christina Kjær, Jørgen Houmøller, Yoni Toker, Angel Rubio, Bruce F. Milne and Steen Brøndsted Nielsen

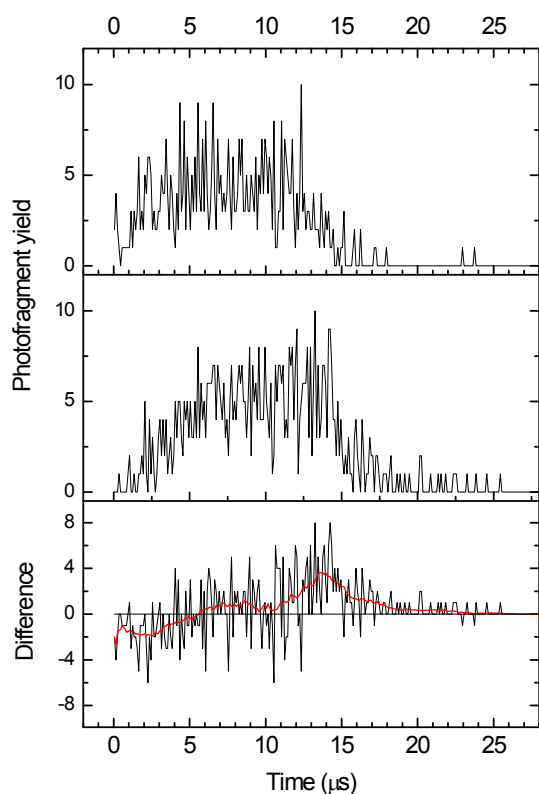

Ion bunch profiles at 50 kV and 25 kV acceleration sampling  $3^+$  from Chl a •  $3^+$ . The time is the flight time to the electrostatic analyser after the laser was fired. The difference between the two ion bunch profiles (25 kV – 50 kV) shows that more ions arrive late at 25 kV acceleration.

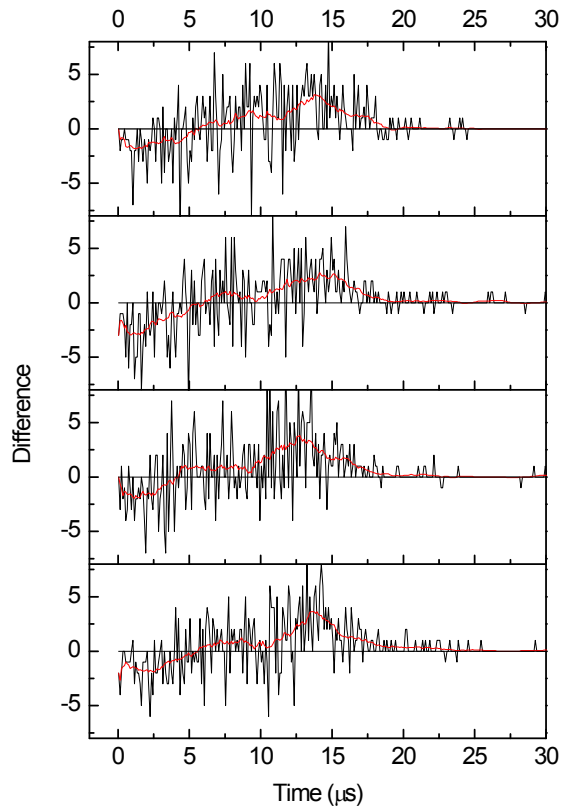

Difference between the two ion bunch profiles (25 kV – 50 kV). From top to bottom: 372 nm, 374 nm, 380 nm and 382nm.

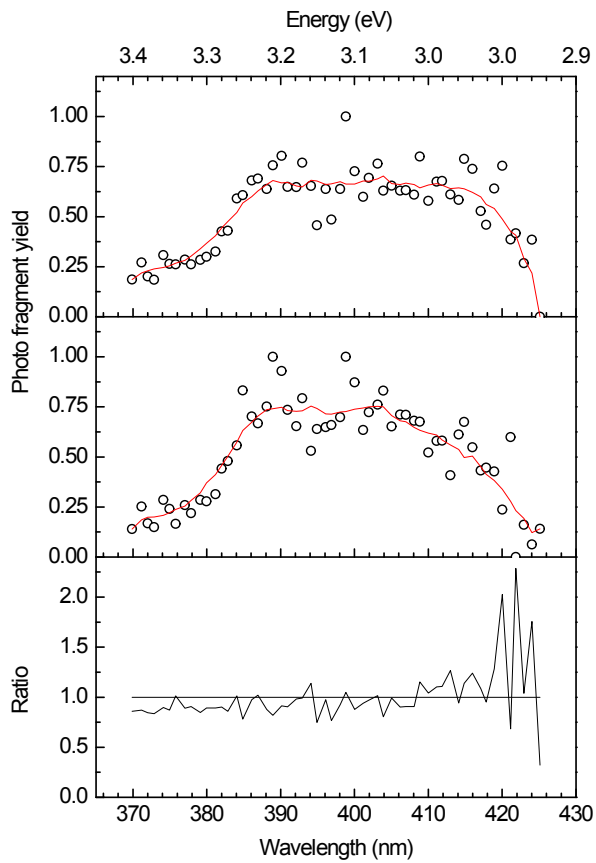

Gas-phase action spectra of Chl a •  $3^+$  recorded at 50 kV and 25 kV and the ratio between the two spectra at each wavelength (50 kV / 25 kV). At low wavelengths there is no indication of too little dissociation at 50 kV due to too long dissociation times. The scatter in the ratio is highest when the absorption is low.

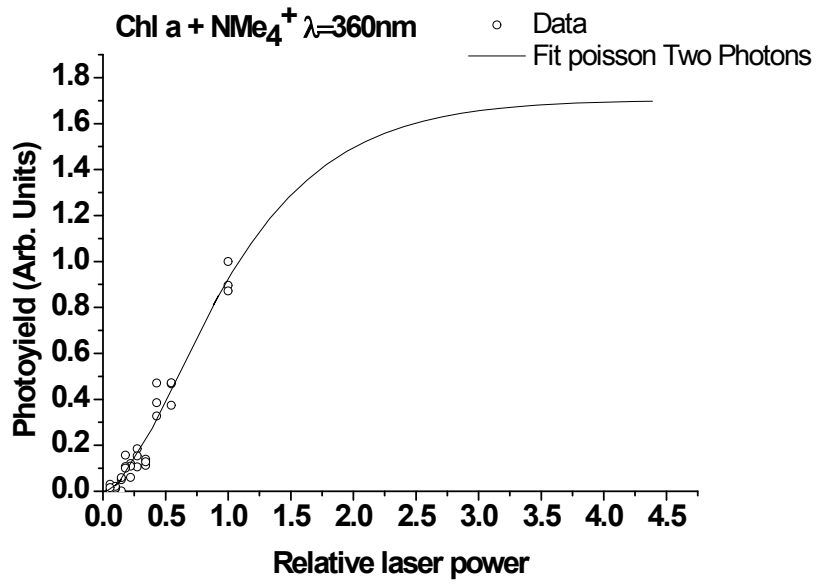

Power-dependence data. The fit is a two-photon Poisson fit with saturation,  $A(1-(1+b)\exp(-bx))$

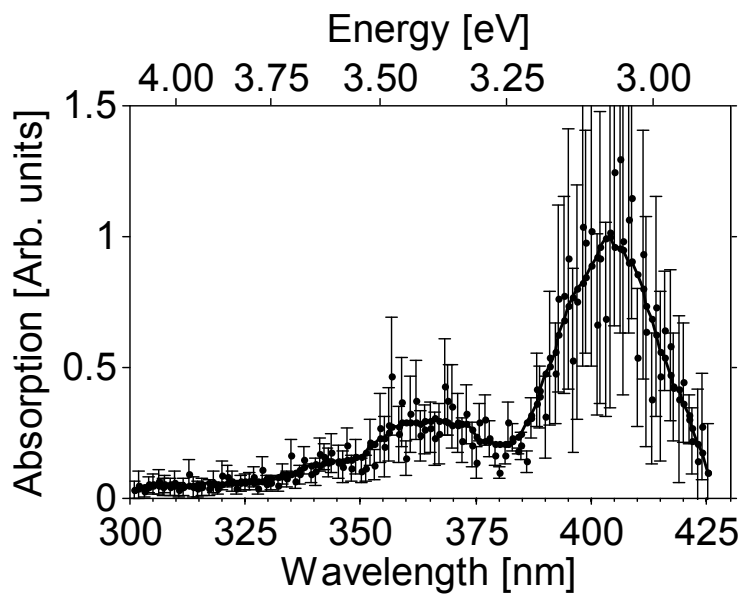

Action spectrum for Chl a + acetylcholine dissociating into acetylcholine.

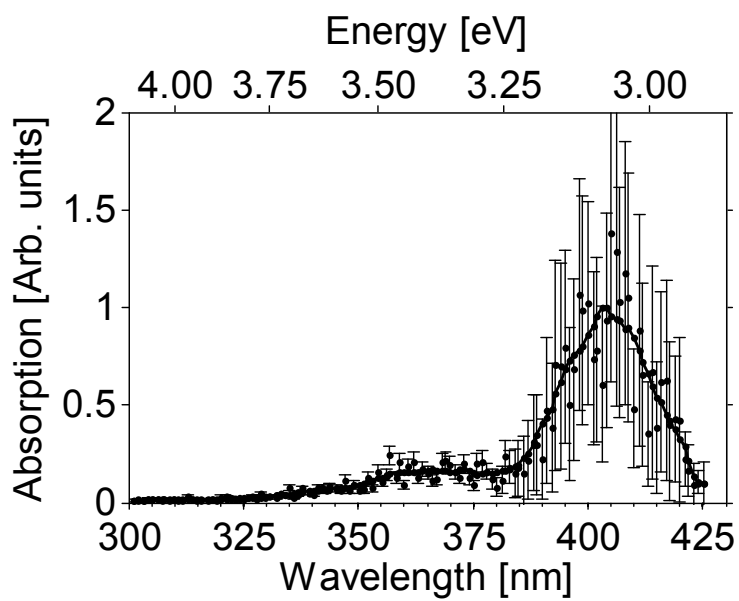

Action spectrum for Chl a + NMe<sub>4</sub><sup>+</sup> dissociating into NMe<sub>4</sub><sup>+</sup>.

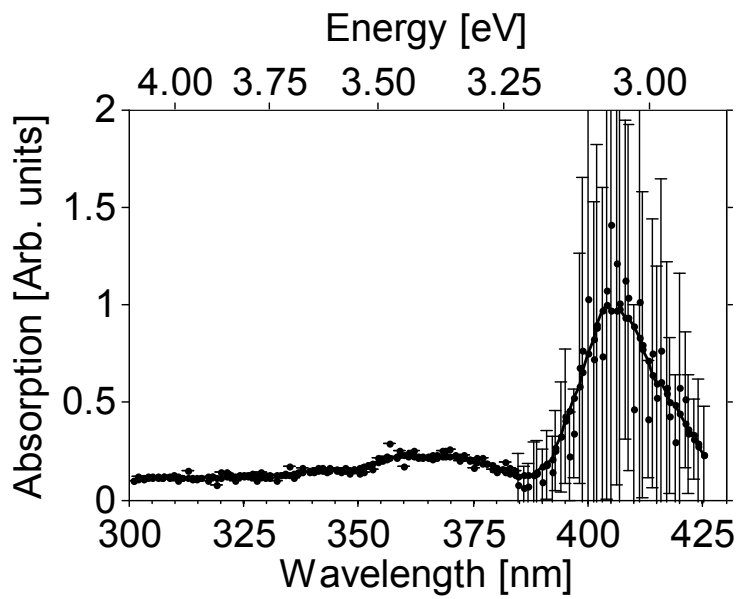

Action spectrum for Chl a + NBu<sub>4</sub><sup>+</sup> dissociating into NBu<sub>4</sub><sup>+</sup>.

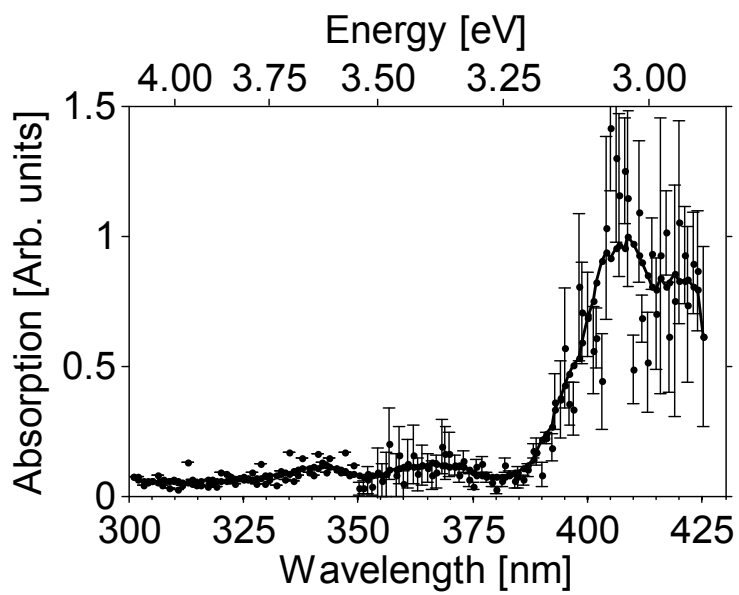

Action spectrum for Chl b + acetylcholine dissociating into acetylcholine.

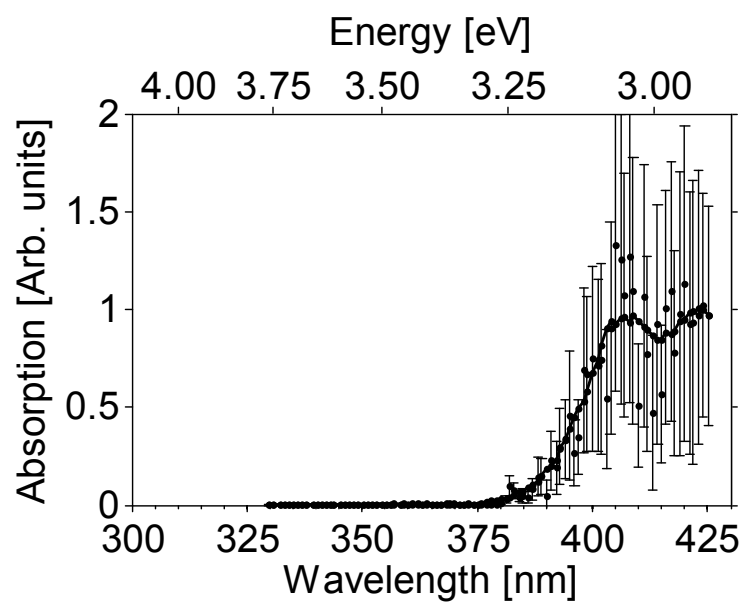

. Action spectrum for Chl b +  $\text{NMe}_4^+$  dissociating into  $\text{NMe}_4^+$ .

**Table S1.** Chl *a* orbital contributions to calculated TD-CAM-B3LYP/Def2-SVP excitations. Lesser contributions having transition probabilities  $\sim 1/2$  of those of the main transitions are given in parentheses. Minor contributions with probabilities less than  $1/2$  not shown.

| Chl <i>a</i>         |            | eV    | Contributing orbital transitions                               |
|----------------------|------------|-------|----------------------------------------------------------------|
| <b>1<sup>+</sup></b> | Soret-band | 3.422 | HOMO→LUMO+1<br>(HOMO-1→LUMO)                                   |
|                      | Soret-band | 3.666 | HOMO-1→LUMO+1<br>(HOMO→LUMO)                                   |
|                      | Minor peak | 3.991 | HOMO→LUMO+2<br>HOMO-1→LUMO+1                                   |
|                      | Minor peak | 4.068 | HOMO-5→LUMO                                                    |
| <b>2<sup>+</sup></b> | Soret-band | 3.378 | HOMO→LUMO+1<br>(HOMO-1→LUMO)                                   |
|                      | Soret-band | 3.363 | HOMO-1→LUMO+2<br>(HOMO-3→LUMO)<br>(HOMO→LUMO)<br>(HOMO→LUMO+2) |
|                      | Minor peak | 4.067 | HOMO-5→LUMO<br>(HOMO→LUMO+2)                                   |
| <b>3<sup>+</sup></b> | Soret-band | 3.361 | HOMO→LUMO+2<br>(HOMO-1→LUMO)                                   |
|                      | Soret-band | 3.603 | HOMO-1→LUMO+2<br>(HOMO→LUMO)<br>(HOMO→LUMO+2)                  |
|                      | Minor peak | 3.919 | HOMO→LUMO+2<br>(HOMO-1→LUMO+2)                                 |
|                      | Minor peak | 4.084 | HOMO-5→LUMO                                                    |
|                      | Minor peak | 4.141 | HOMO-5→LUMO                                                    |
|                      | Minor peak | 4.170 | HOMO-1→LUMO+2<br>HOMO-5→LUMO<br>HOMO-5→LUMO+2                  |
|                      | Minor peak | 4.170 | HOMO-5→LUMO<br>HOMO-5→LUMO+2                                   |
| No tag               | Soret-band | 3.335 | HOMO-2→LUMO<br>HOMO-1→LUMO                                     |
|                      | Soret-band | 3.450 | HOMO-2→LUMO<br>HOMO-1→LUMO<br>HOMO-2→LUMO+1<br>HOMO→LUMO+1     |
|                      | Soret-band | 3.613 | HOMO-1→LUMO+1<br>HOMO→LUMO                                     |
|                      | Minor peak | 3.999 | HOMO-4→LUMO<br>HOMO-2→LUMO                                     |
|                      | Minor peak | 3.999 | HOMO-4→LUMO<br>HOMO-2→LUMO                                     |



**Table S2.** Chl *b* orbital contributions to calculated TD-CAM-B3LYP/Def2-SVP excitations. Lesser contributions having transition probabilities  $\sim 1/2$  of those of the main transitions are given in parentheses. Minor contributions with probabilities less than  $1/2$  not shown.

| Chl <i>b</i>         |            | eV    | Contributing orbital transitions                                              |
|----------------------|------------|-------|-------------------------------------------------------------------------------|
| <b>1<sup>+</sup></b> | Soret-band | 3.251 | HOMO→LUMO+1<br>(HOMO-1→LUMO)                                                  |
|                      | Soret-band | 3.429 | HOMO-1→LUMO+1<br>(HOMO→LUMO)                                                  |
|                      | Minor peak | 4.018 | HOMO→LUMO+2<br>HOMO-1→LUMO+2                                                  |
|                      | Minor peak | 4.134 | HOMO-5→LUMO                                                                   |
| <b>2<sup>+</sup></b> | Soret-band | 3.226 | HOMO→LUMO+1<br>(HOMO-1→LUMO)                                                  |
|                      | Soret-band | 3.406 | HOMO-1→LUMO+2<br>(HOMO→LUMO)                                                  |
|                      | Minor peak | 4.140 | HOMO-5→LUMO                                                                   |
| <b>3<sup>+</sup></b> | Soret-band | 3.195 | HOMO→LUMO+2<br>(HOMO-1→LUMO)                                                  |
|                      | Soret-band | 3.383 | HOMO-1→LUMO+2<br>(HOMO→LUMO)                                                  |
|                      | Minor peak | 3.930 | HOMO→LUMO+2<br>HOMO-1→LUMO+2                                                  |
|                      | Minor peak | 4.111 | HOMO-10→LUMO<br>(HOMO-6→LUMO)<br>(HOMO-10→LUMO+2)                             |
|                      | Minor peak | 4.134 | HOMO-6→LUMO                                                                   |
|                      | Minor peak | 4.142 | HOMO-1→LUMO+2<br>HOMO→LUMO+2<br>(HOMO-10→LUMO)                                |
| No tag               | Soret-band | 3.156 | HOMO→LUMO+1<br>HOMO-1→LUMO                                                    |
|                      | Soret-band | 3.320 | HOMO-2→LUMO<br>HOMO-1→LUMO+1<br>(HOMO-1→LUMO)<br>(HOMO→LUMO)<br>(HOMO→LUMO+1) |
|                      | Soret-band | 3.370 | HOMO-1→LUMO+2<br>HOMO-2→LUMO<br>(HOMO-2→LUMO+1)                               |
|                      | Minor peak | 4.214 | HOMO-5→LUMO<br>(HOMO-4→LUMO)                                                  |
